# Supplementary material
Source: PubMed Central journal article supplement (PMC3103318)

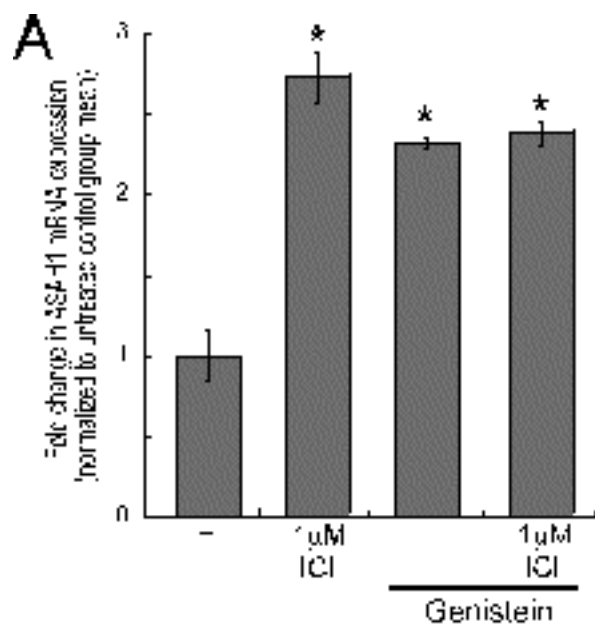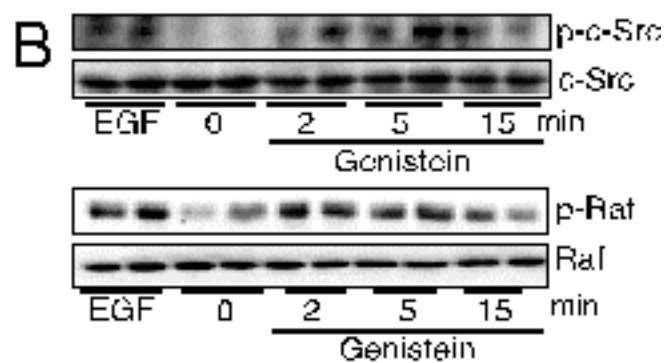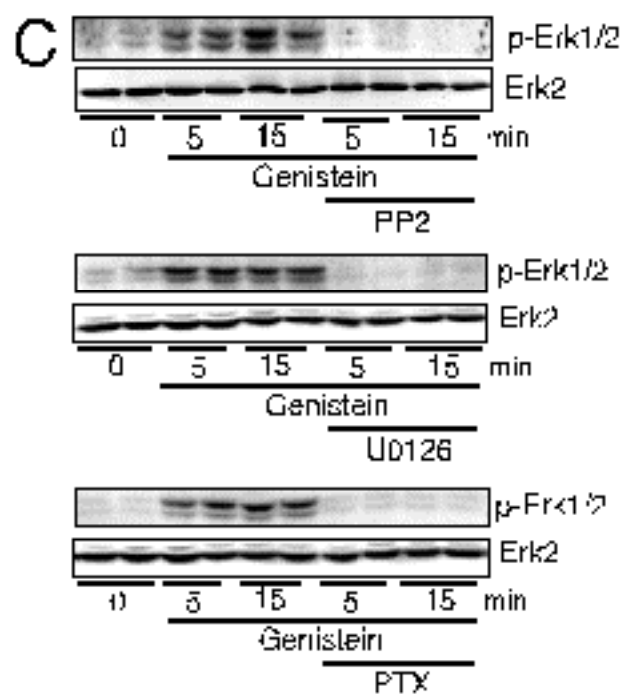

Supplement: supp_M110.195826_Suppl.pdf [file supp_M110.195826_Suppl.pdf]
